# Supplementary material
Source: PubMed Central journal article supplement (PMC3736129)

**Fig 3C (upper panels)**

**Suv4-20**

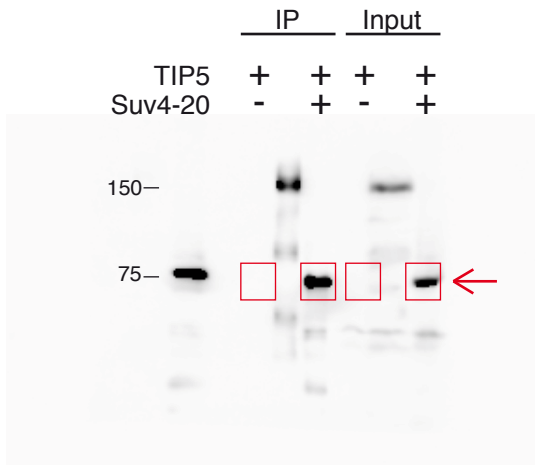

**TIP5**

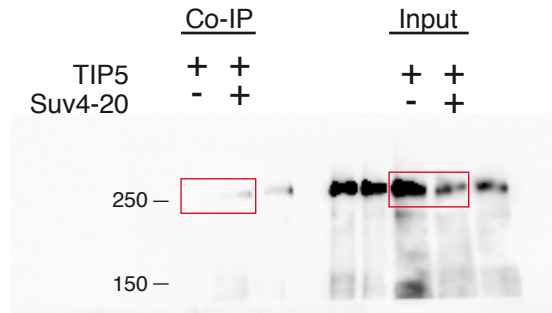

**Fig 3C (lower panels)**

**SIRT6**

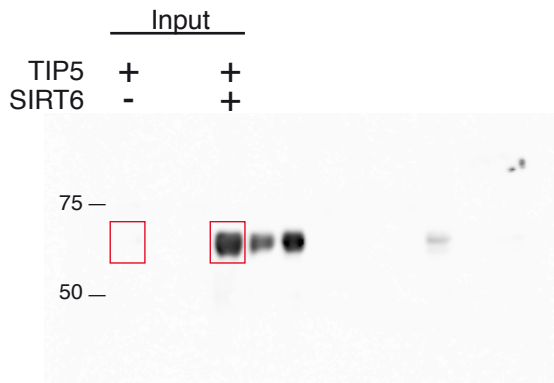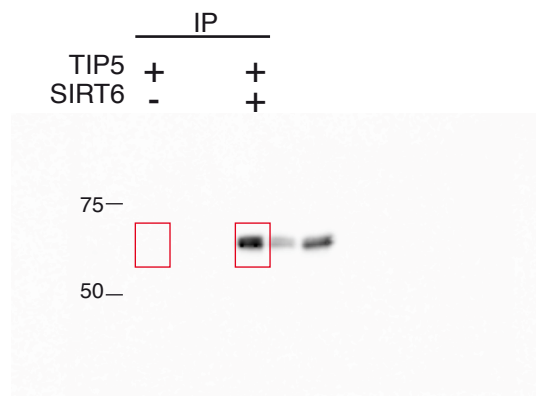

**TIP5**

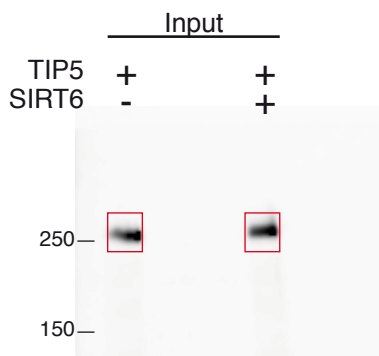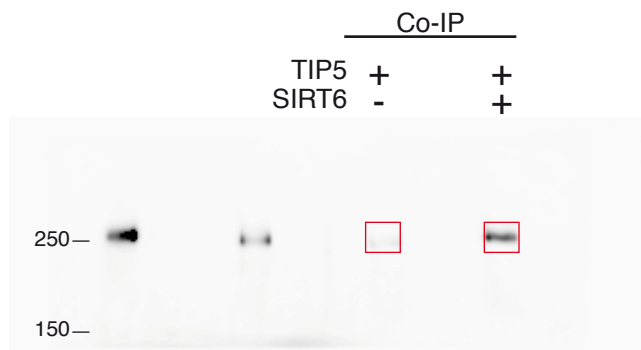

**Fig 3F (upper panels)**

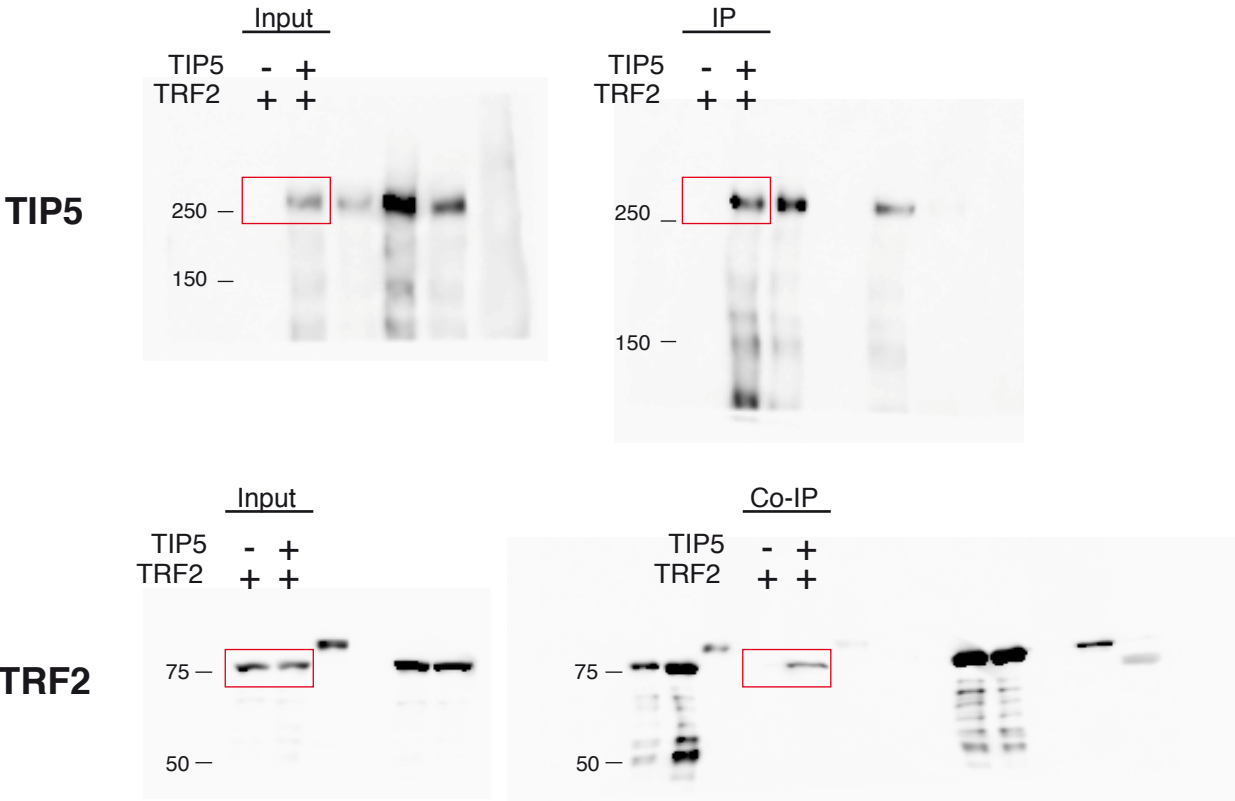

**Fig 3F (lower panels)**

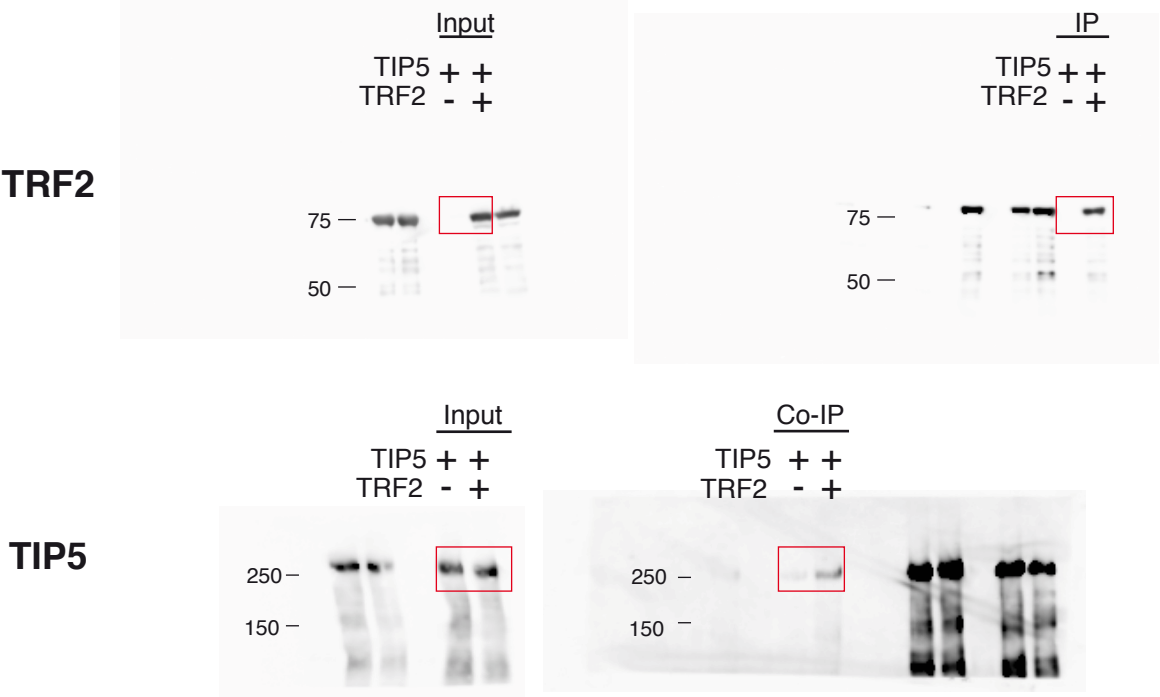

**Fig 3B**

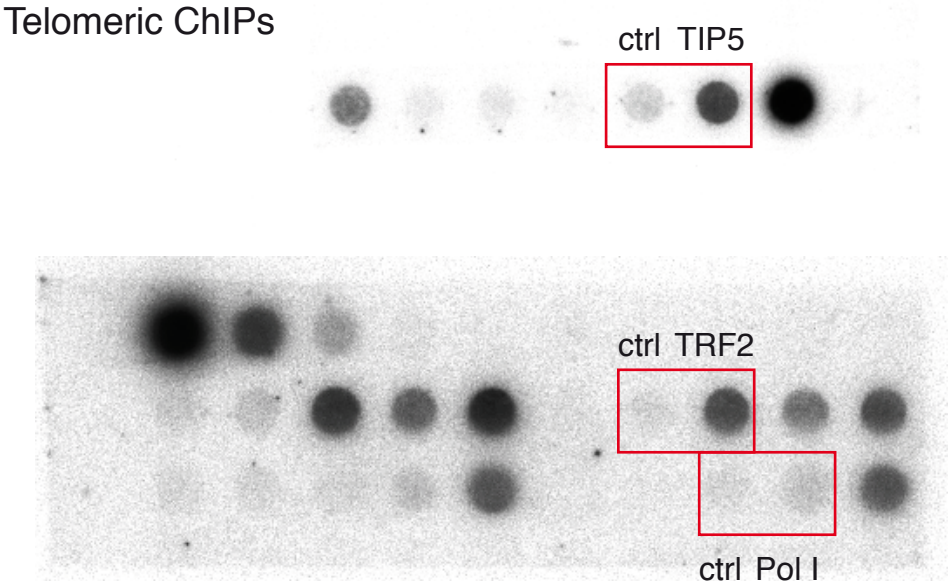

**Fig 3G**

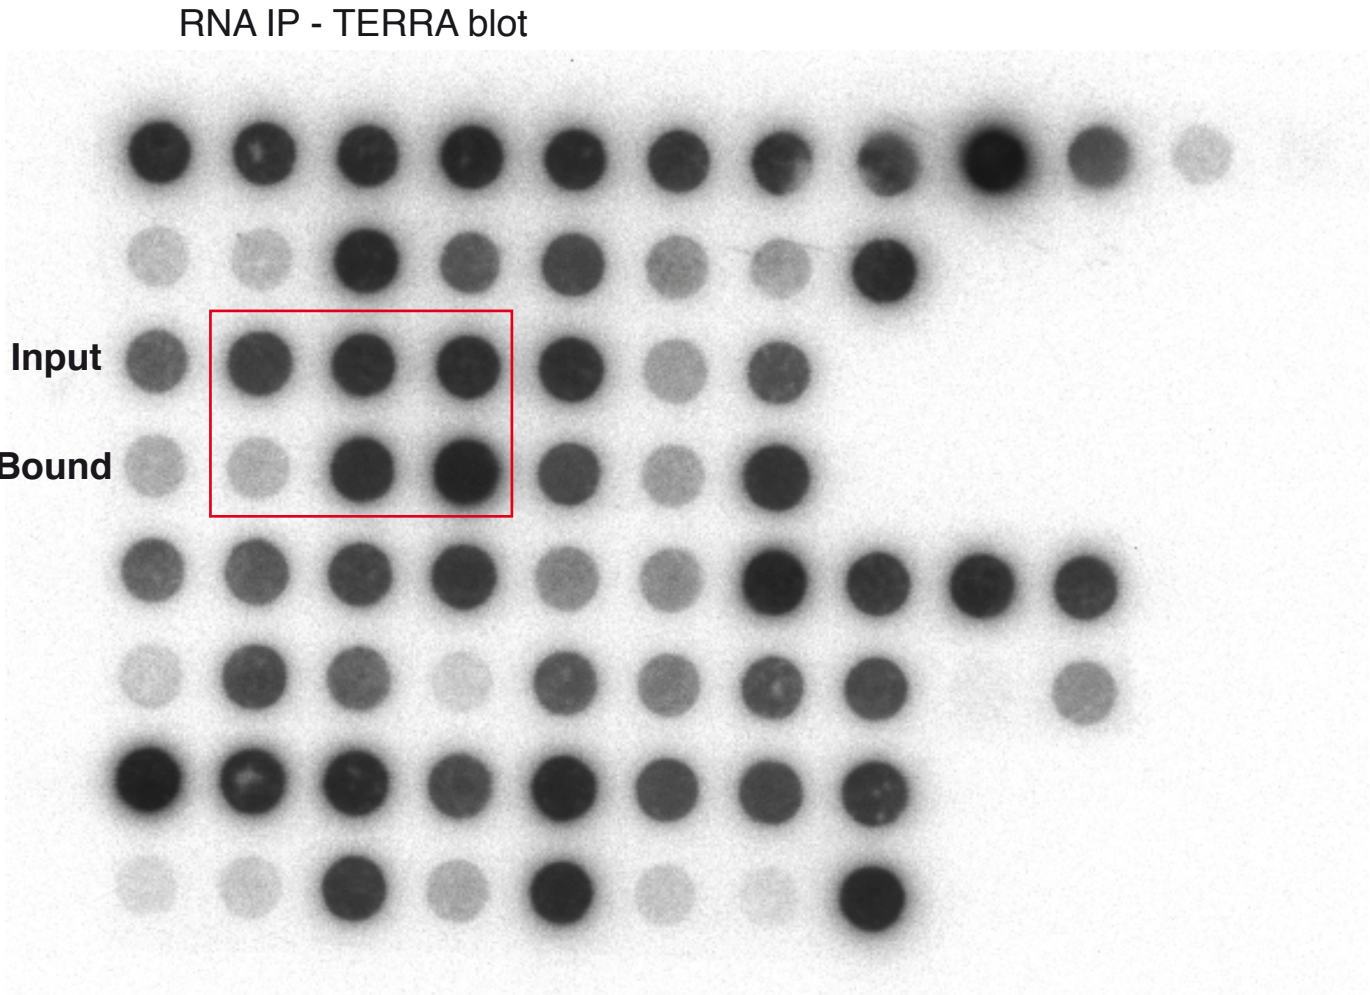

Supplement: embor201387df3.pdf [file embor201387df3.pdf]
