# Supplementary material
Source: PubMed Central journal article supplement (PMC3736129)
Supplement: embor201387dfs1.pdf [file embor201387dfs1.pdf]

## Fig S1C

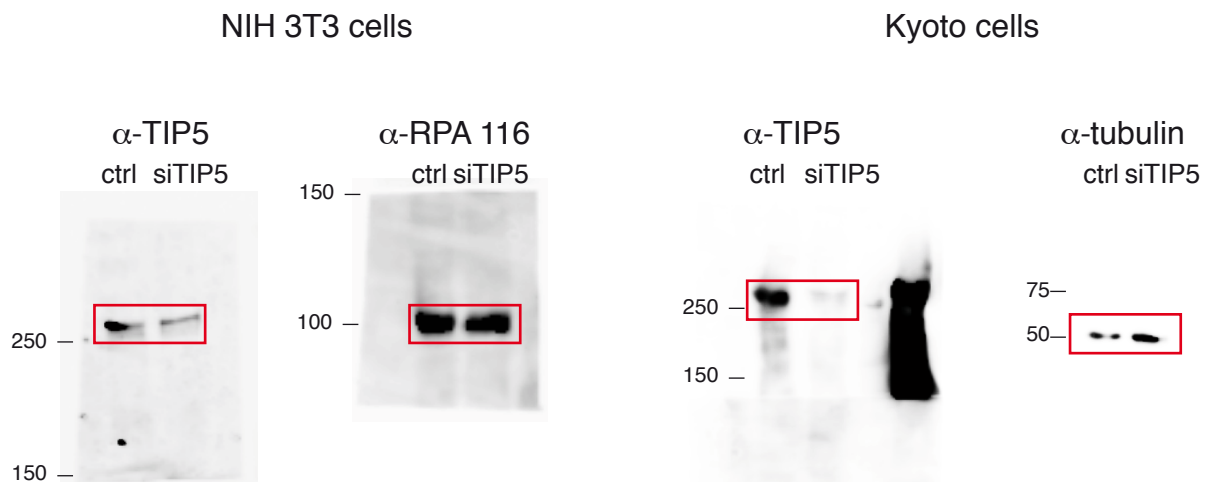

Unfortunately we cannot show the original images for U2OS cells because they were stored on the stolen computer.
