# Supplementary material
Source: PubMed Central journal article supplement (PMC3736129)
Supplement: embor201387dfs4.pdf [file embor201387dfs4.pdf]

**Fig S4A**

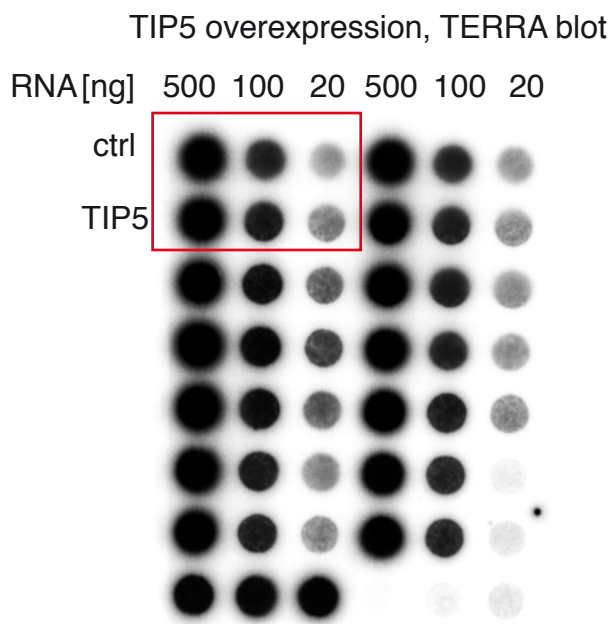

Marked section is presented in the figure.

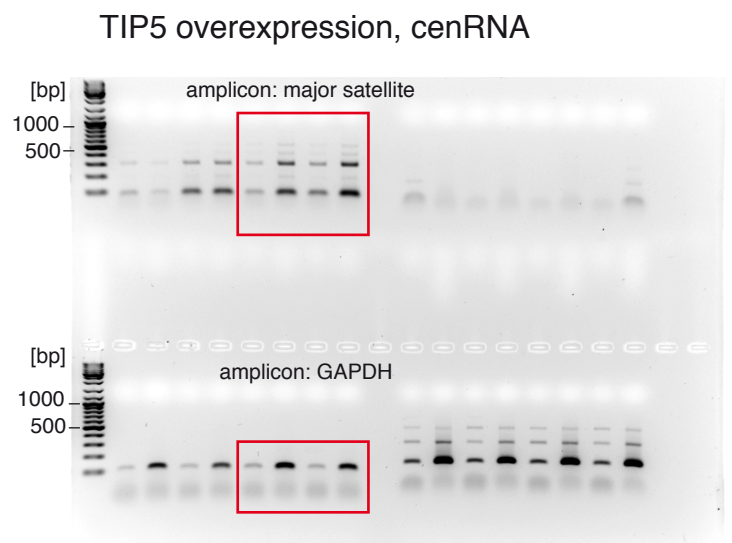

Boxed regions are shown in the figure.

**Fig S4B**

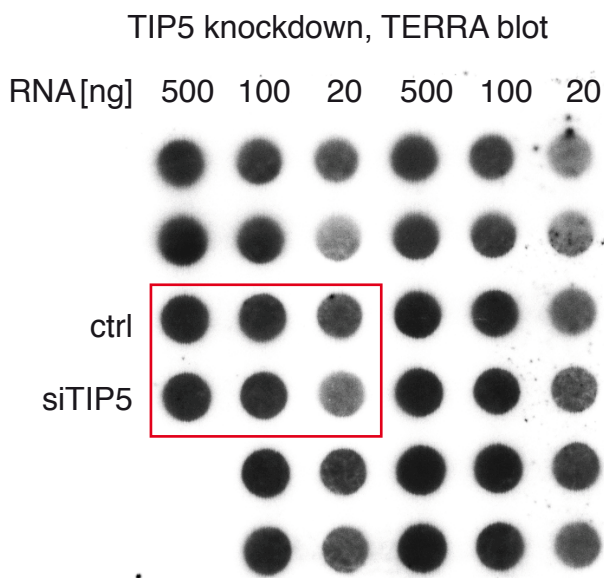

Marked section is presented in the figure.

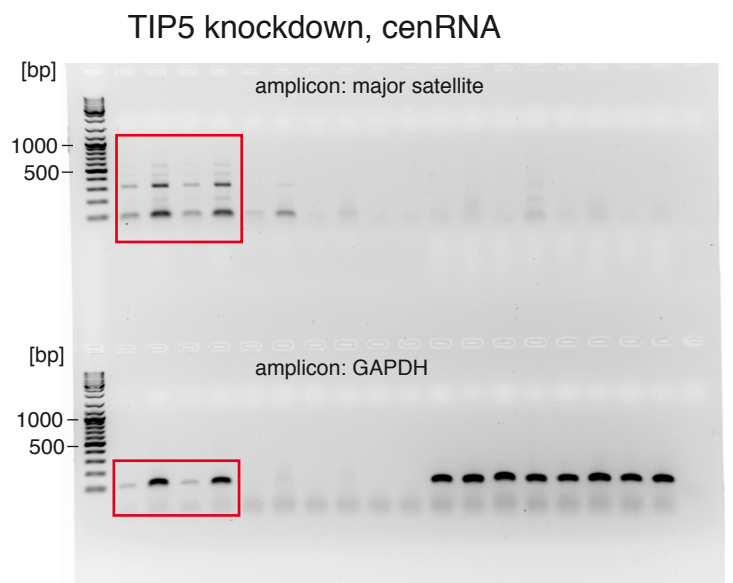

Boxed regions are shown in the figure.
