# Supplementary material
Source: PubMed Central journal article supplement (PMC3736129)

**Fig 1B**

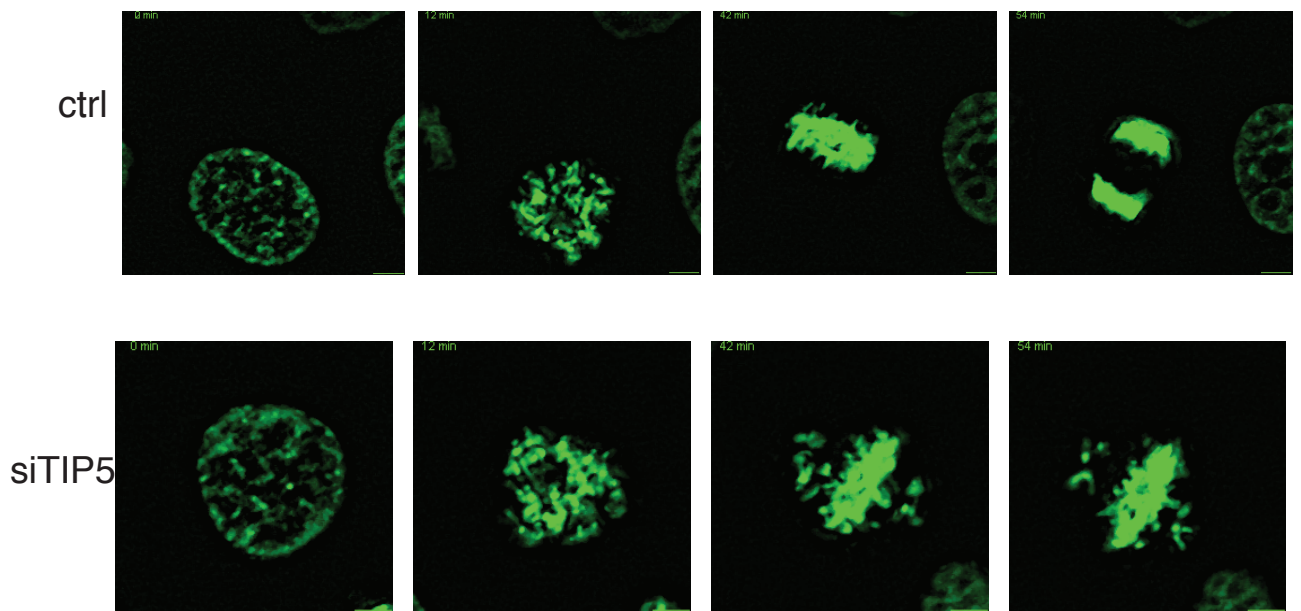

**Fig 1D**

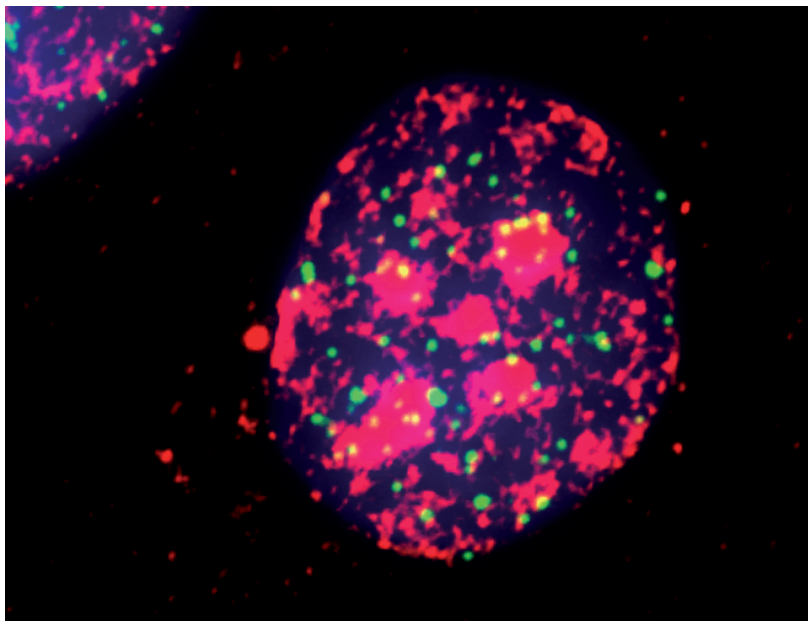

Supplement: embor201387df1.pdf [file embor201387df1.pdf]

Fig 2A

ctrl

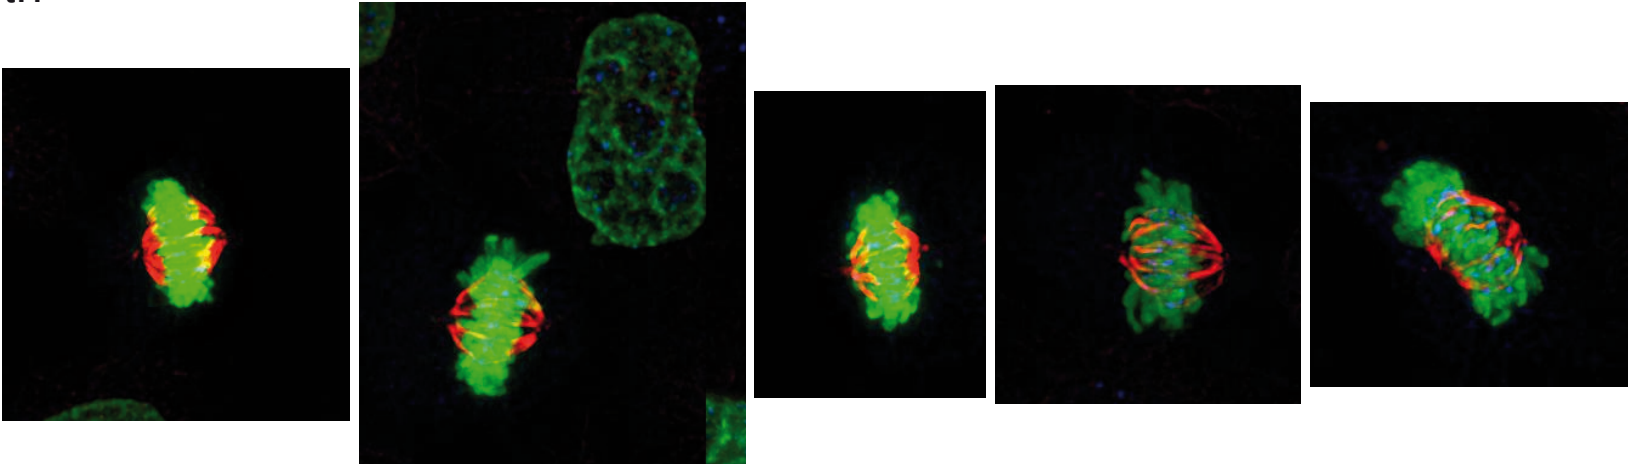

siTIP5

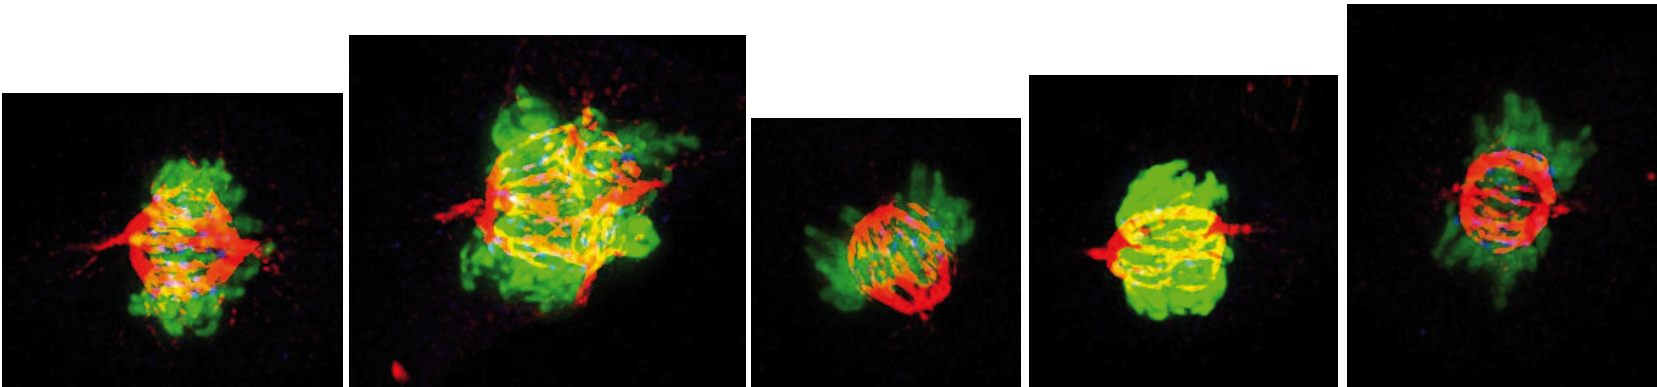

Supplement: embor201387df2.pdf [file embor201387df2.pdf]

**Fig 4C**

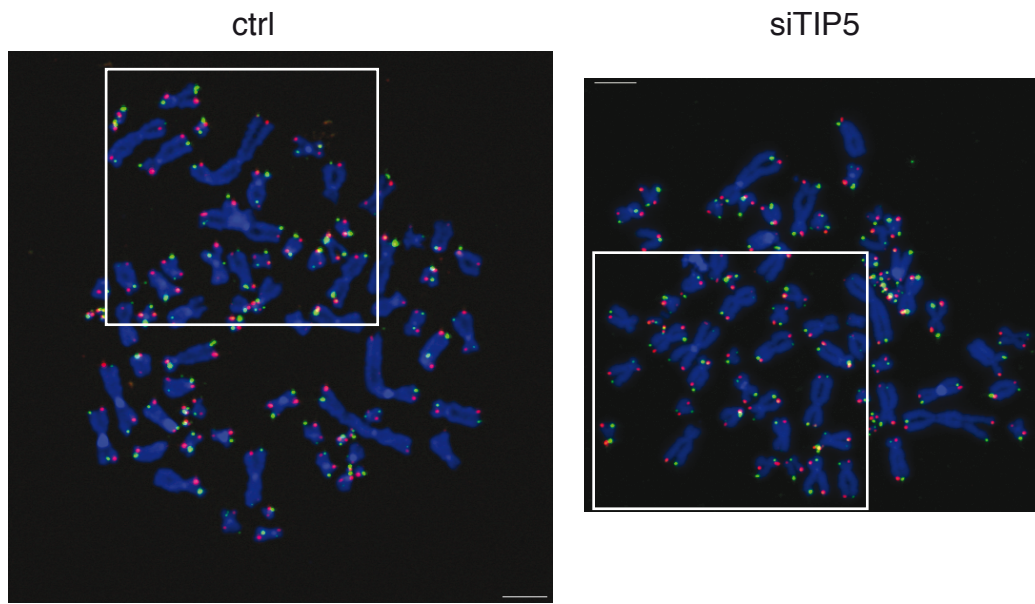

Supplement: embor201387df4.pdf [file embor201387df4.pdf]

**Fig S3A**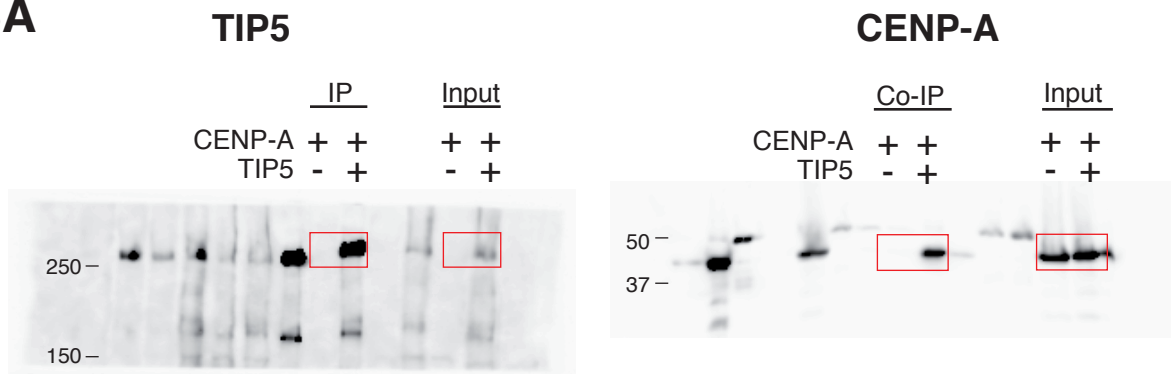**Fig S3B**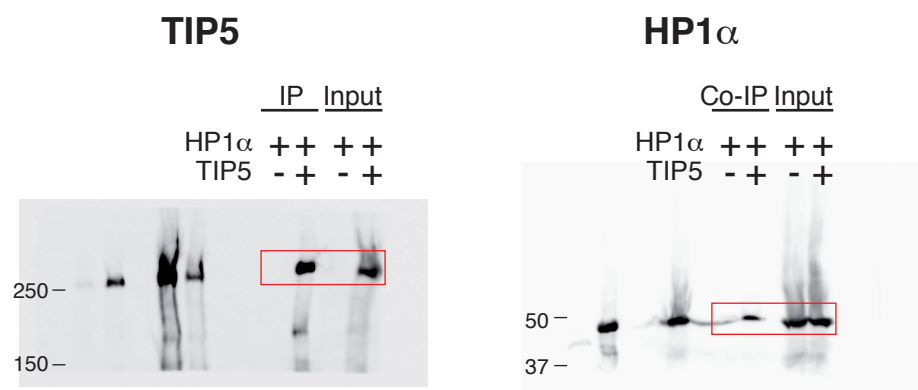**Fig S3D**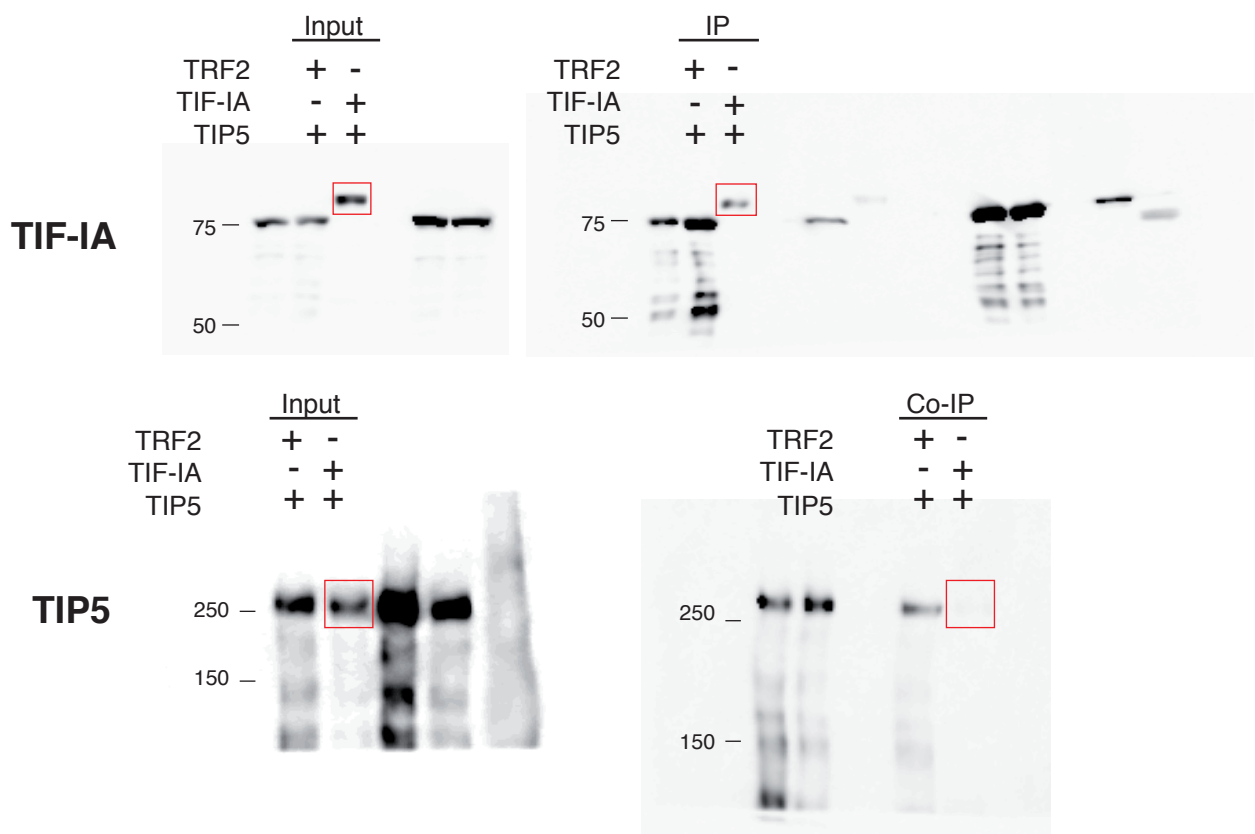

Supplement: embor201387dfs3.pdf [file embor201387dfs3.pdf]

**Fig S5A**

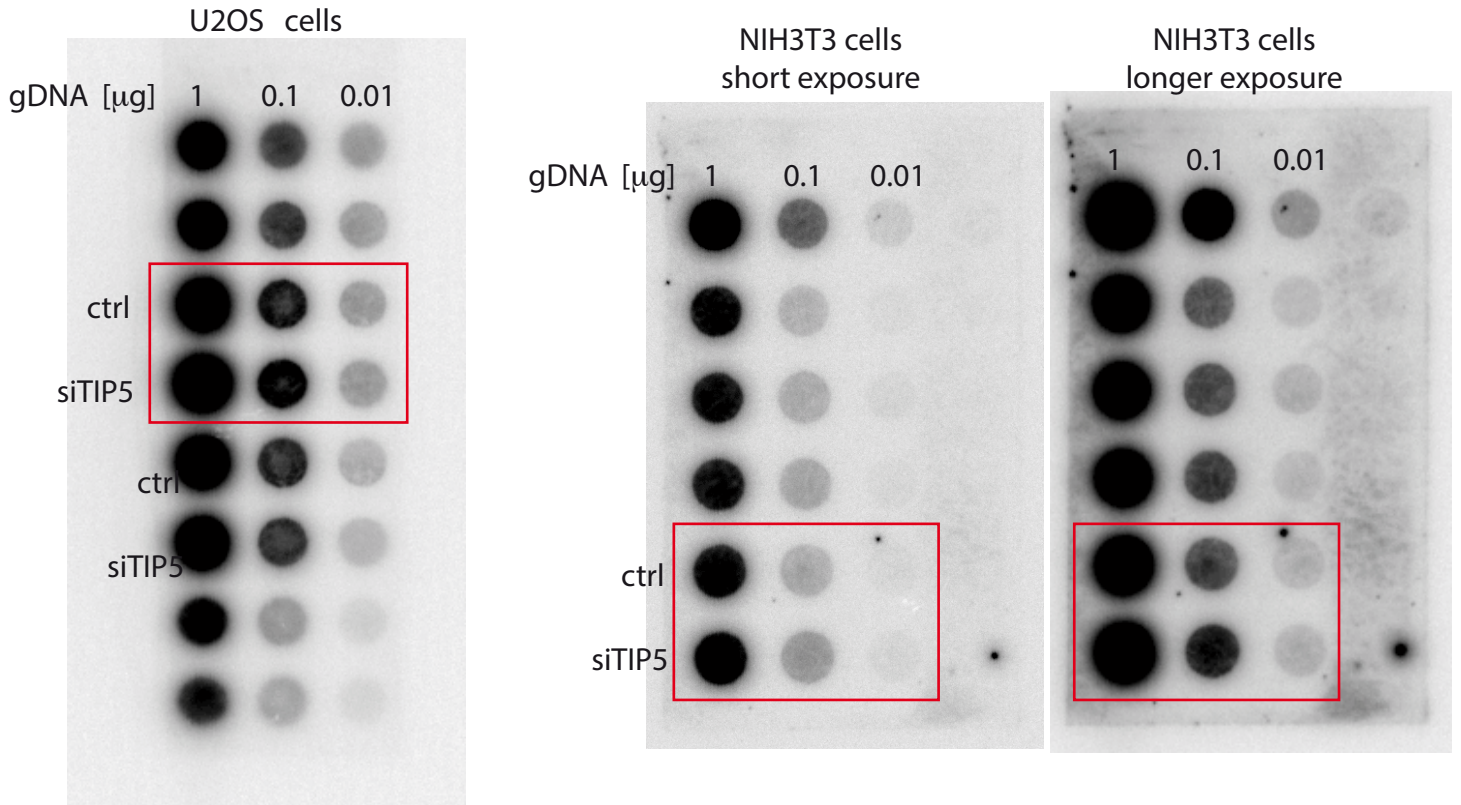

Fig S5B

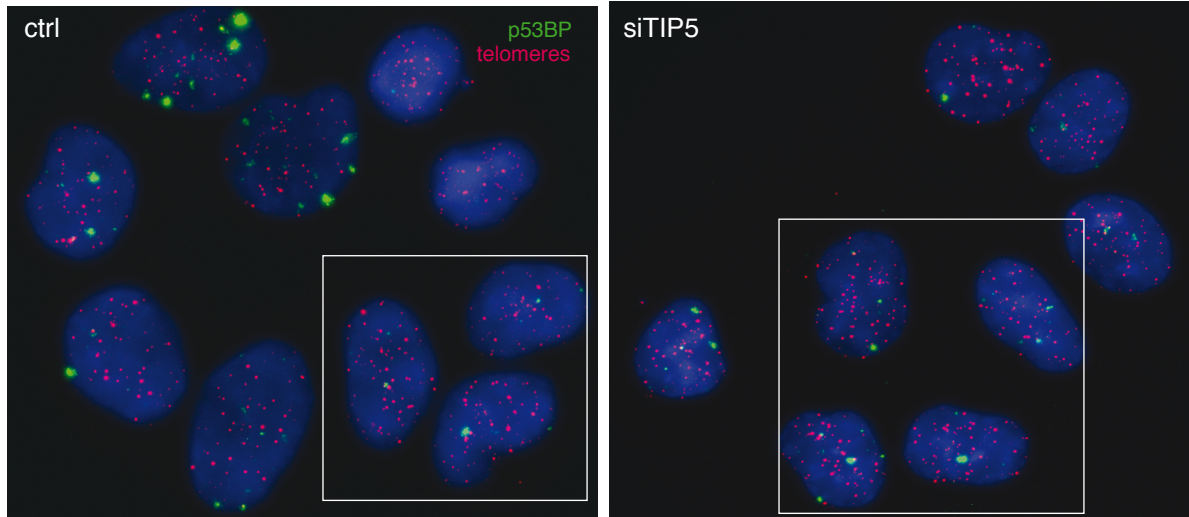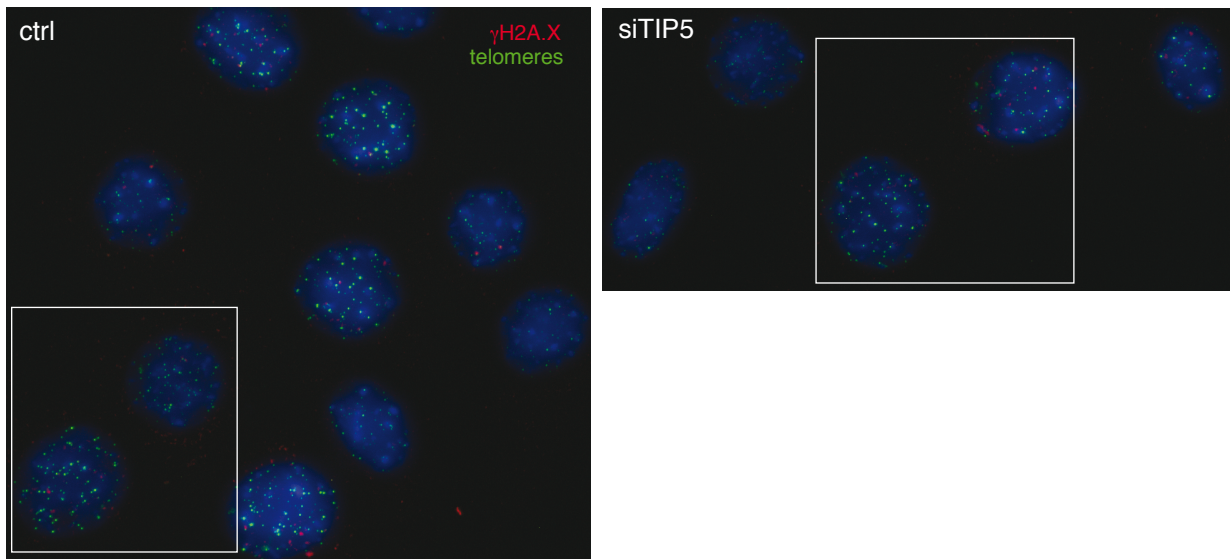

Fig S5C

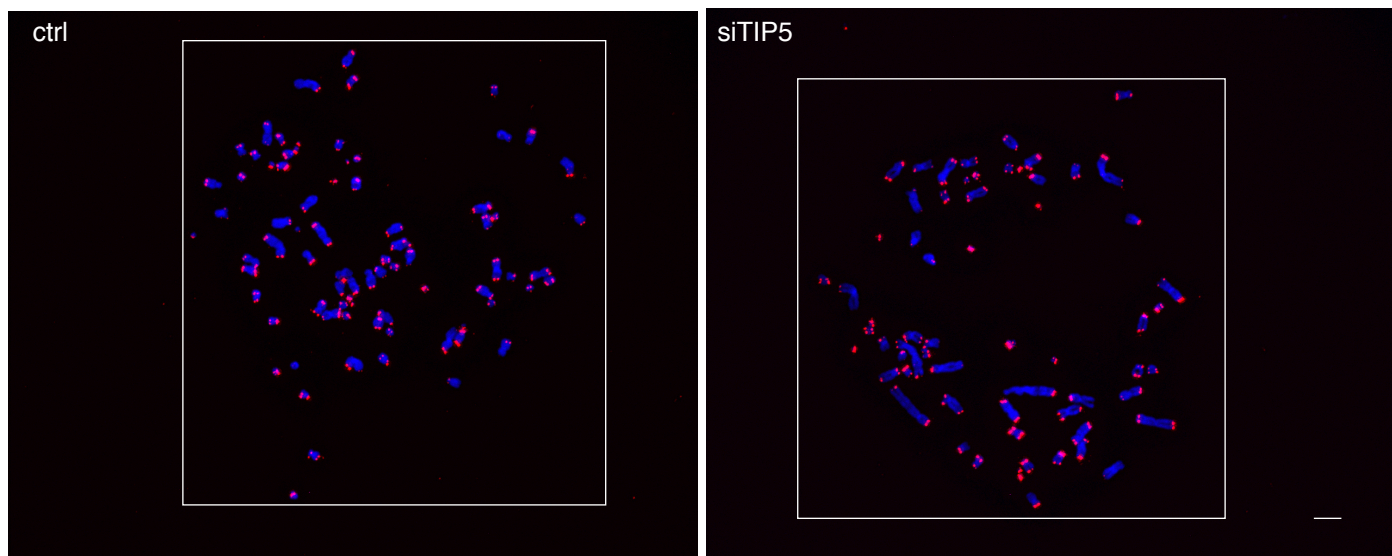

Supplement: embor201387dfs5.pdf [file embor201387dfs5.pdf]
